# Supplementary material for: Effects of Prehabilitation on Functional Capacity in Aged Patients Undergoing Cardiothoracic Surgeries: A Systematic Review
Source: MDPI journal article supplement (doi:10.3390/healthcare9111602), 2021-11-22
Supplement: s1 [file s1]

**Table S1.** Result of search strategy for each database.

| Databases               | Dates      | Search Strategy                                                                                                                                                                                                                                                                                                                                                                                                                                                                                                                                                                                                                                                                                                                                                                                                                                                                                                                               | Results |
|-------------------------|------------|-----------------------------------------------------------------------------------------------------------------------------------------------------------------------------------------------------------------------------------------------------------------------------------------------------------------------------------------------------------------------------------------------------------------------------------------------------------------------------------------------------------------------------------------------------------------------------------------------------------------------------------------------------------------------------------------------------------------------------------------------------------------------------------------------------------------------------------------------------------------------------------------------------------------------------------------------|---------|
| MEDLINE<br>(via PubMed) | 04/13/2021 | (aged[Mesh] OR aged OR aging[Mesh] OR "aged, 80 and over" OR elder* OR elderly OR older* OR "Frailty"[Mesh] OR frail*) AND (Cardiothoracic OR "Cardiothoracic surgery" OR "Thoracic Surgery" OR "Cardiac Surgery" OR "Heart Surgery" OR "pulmonary surgical procedures" OR "Esophageal surgery" OR "Lung Transplantation" OR "Heart Transplantation") AND ("Preoperative Exercise" OR "Preoperative Rehabilitation" OR prehabilitation OR Prehab* OR "Pre-operative Conditioning" OR exercise OR "Exercise Therapy" OR "exercise training" OR "Physical Activity" OR "Physical Therapy" OR "Inspiratory muscle training" OR "Cardiopulmonary exercise" OR "Breathing Exercises" OR "Nutrition Therapy" OR "Cognitive Behavioral Therapy" OR "cognitive therapy") Filters: Randomized Controlled Trial, Humans                                                                                                                                 | 340     |
| Web of Science          | 04/14/2021 | (aged OR aged OR aging OR "aged, 80 and over" OR elder* OR elderly OR older* OR Frailty OR frail*) AND (Cardiothoracic OR "Cardiothoracic surgery" OR "Thoracic Surgery" OR "Cardiac Surgery" OR "Heart Surgery" OR "pulmonary surgical procedures" OR "Esophageal surgery" OR "Lung Transplantation" OR "Heart Transplantation") AND ("Preoperative Exercise" OR "Preoperative Rehabilitation" OR prehabilitation OR Prehab* OR "Pre-operative Conditioning" OR exercise OR "Exercise Therapy" OR "exercise training" OR "Physical Activity" OR "Physical Therapy" OR "Inspiratory muscle training" OR "Cardiopulmonary exercise" OR "Breathing Exercises" OR "Nutrition Therapy" OR "Cognitive Behavioral Therapy" OR "cognitive therapy") Refine to: Clinical Trial                                                                                                                                                                        | 441     |
| Scopus                  | 04/15/2021 | #1: (aged OR aged OR aging OR "aged, 80 and over" OR elder* OR elderly OR older* OR frailty OR frail*) AND ( cardiothoracic OR "Cardiothoracic surgery" OR "Thoracic Surgery" OR "Cardiac Surgery" OR "Heart Surgery" OR "pulmonary surgical procedures" OR "Esophageal surgery" OR "Lung Transplantation" OR "Heart Transplantation" ) AND ( "Preoperative Exercise" OR "Preoperative Rehabilitation" OR prehabilitation OR prehab* OR "Pre-operative Conditioning" OR exercise OR "Exercise Therapy" OR "exercise training" OR "Physical Activity" OR "Physical Therapy" OR "Inspiratory muscle training" OR "Cardiopulmonary exercise" OR "Breathing Exercises" OR "Nutrition Therapy" OR "Cognitive Behavioral Therapy" OR "cognitive therapy")<br>#2: "Clinical Trial" OR Trial OR "Randomized controlled trial"<br>#3: Observational OR "case report" OR cohort OR "case control"<br>#4: #1 AND #2 AND NOT #3 (489). Limit to: articles | 367     |

Table S2. Characteristics of the randomized clinical trials included.

| Author/s<br>and year               | Participants                                                                                                                             | Training with Physical Exercise, including Other Prehabilitation                                                                  |                                                                                                                                                                                                                                                                                                                                                                                                                                                                                                                                                                   |                                                                               |                                                                                             | Result Measures                                                                                                                                                                                                                                                                                                                                      | Main Findings                                                                                                                                                                                                                                                                                                                                                                                                                                                                                         |
|------------------------------------|------------------------------------------------------------------------------------------------------------------------------------------|-----------------------------------------------------------------------------------------------------------------------------------|-------------------------------------------------------------------------------------------------------------------------------------------------------------------------------------------------------------------------------------------------------------------------------------------------------------------------------------------------------------------------------------------------------------------------------------------------------------------------------------------------------------------------------------------------------------------|-------------------------------------------------------------------------------|---------------------------------------------------------------------------------------------|------------------------------------------------------------------------------------------------------------------------------------------------------------------------------------------------------------------------------------------------------------------------------------------------------------------------------------------------------|-------------------------------------------------------------------------------------------------------------------------------------------------------------------------------------------------------------------------------------------------------------------------------------------------------------------------------------------------------------------------------------------------------------------------------------------------------------------------------------------------------|
|                                    |                                                                                                                                          | Components                                                                                                                        |                                                                                                                                                                                                                                                                                                                                                                                                                                                                                                                                                                   |                                                                               |                                                                                             |                                                                                                                                                                                                                                                                                                                                                      |                                                                                                                                                                                                                                                                                                                                                                                                                                                                                                       |
|                                    |                                                                                                                                          | Context/<br>Therapists                                                                                                            | Intervention, by groups                                                                                                                                                                                                                                                                                                                                                                                                                                                                                                                                           | Duration/<br>Frequency                                                        | Adherence                                                                                   |                                                                                                                                                                                                                                                                                                                                                      |                                                                                                                                                                                                                                                                                                                                                                                                                                                                                                       |
| Bathia and<br>Kaiser [27],<br>2019 | Pulmonary<br>resection due<br>to NSCLC,<br>N, Mean Age<br>(MA)=151,<br>64; IG, MA:<br>n=74,<br>64 ± (13); CG,<br>MA: n=77,<br>64 ± (10). | Respiratory<br>care service,<br>Geneva<br>University<br>Hospital<br>(Switzerland);<br>Respiratory<br>Physiotherapis<br>ts (PhTs). | Prehabilitation based<br>on exercises.<br>Supervised sessions.<br>→IG*: Individualized<br>HIIT sessions (Motion<br>Cycle 500, Germany)<br>adjusted by Borg<br>scale > 5; 2 10-minute<br>series interspersed by a<br>4-minute break:<br>- Warming-up at 50%<br>Peakw- HIIT for<br>15 seconds at 100%<br>Peakw interspersed by a<br>15-second break until<br>reaching 10 minutes-<br>5-minute cooling-down<br>at 30% Peakw<br>→ CG: Usual care (risk<br>assessment,<br>peri-operative blood<br>and medication<br>management, and<br>hospital-related<br>education). | 2-4 weeks<br>(median:<br>26 days,<br>IQR: 21-33<br>days); 3<br>times/<br>week | 87% ± 18<br>compliance<br>(median:<br>8 sessions,<br>Interquartile<br>Range [IQR]:<br>7-10) | -Duration:<br>Unknown.<br>-Measurement:<br>T1: Surgery<br>decision; T2: Day<br>before the<br>surgery.<br>-Aerobic /<br>Physical exercise<br>capacity <sup>A, C</sup> :<br>Peakw, Peak VO <sub>2</sub><br>-Functional<br>capacity:<br>6MWT <sup>A, C</sup><br>At-rest Heart<br>Rate (HR) <sup>A, C</sup><br>-HR after<br>cooling-down <sup>A, C</sup> | The IG improved<br>functional capacity<br>by 20% (6MWT;<br>95% CI: 14-26%).<br>-The IG improved<br>aerobic capacity by<br>14% (Peak VO <sub>2</sub> ;<br>95% CI: 3-26%) and<br>aerobic power by<br>7% (Peakw; 95% CI:<br>2-13%); in addition,<br>HR <sub>at rest</sub> was<br>reduced by<br>6 bpm (95% CI:<br>from -4 to -7 bpm).<br>-In a subsequent<br>analysis about this<br>sample of<br>patients (Licker et a<br>l., 2017), HIIT also<br>reduced<br>pulmonary POCs<br>and length of ICU<br>stay. |

[illegible]

|                          |                                                                                                                   |                                                                                                                                    |                                                                                                                                                                                                                                                                      |                          |                                                                                                                       |                                                                           |                                                                                                           |
|--------------------------|-------------------------------------------------------------------------------------------------------------------|------------------------------------------------------------------------------------------------------------------------------------|----------------------------------------------------------------------------------------------------------------------------------------------------------------------------------------------------------------------------------------------------------------------|--------------------------|-----------------------------------------------------------------------------------------------------------------------|---------------------------------------------------------------------------|-----------------------------------------------------------------------------------------------------------|
| Lai et al.<br>[28], 2017 | Pulmonary resection due to NSCLC, N, MA=101, 64.1 ± (7.4); IG, MA: n=51, 63.8 ± (8.2); CG, MA: n=50, 64.6 ± (6.6) | West China hospital rehabilitation room at full pre-operative hospitalization regime (Chengdu, China). PhTs and experienced nurses | Prehabilitation based on AT + IMT. Supervised sessions.                                                                                                                                                                                                              | 1-week, daily AT and IMT | 89.4% compliance (n=2 did not tolerate intensity, n=2 did not notice any improvement, n=2 surgery was moved forward). | -Duration Unknown.                                                        | -6MWT increased significantly in the IG, 22.9 ± 25.9 m, when compared to 4.2 ± 9.2 m in the CG (p<0.001). |
|                          |                                                                                                                   |                                                                                                                                    |                                                                                                                                                                                                                                                                      |                          |                                                                                                                       | -Measurement: T1: Prehab start, T2: Prehab end, 1 day before the surgery. | -PEF improved by 21 l/min in the IG (95% CI: 7.2–34.8; p=0.003).                                          |
|                          |                                                                                                                   |                                                                                                                                    | →IG*. (a) Moderate AT for 30 minutes adjusted by SE (Borg scale > 6) and O <sub>2</sub> Sat < 88%. (b) Supervised IMT sessions: Deep breaths and incentive spirometry (HUDSON RCI 2500, USA), 20 repetitions/ session; and abdominal breadths during 15-30'/session. |                          |                                                                                                                       | -Functional capacity: 6MWT <sup>A, C</sup>                                | -QoL: Improvement in the IG and CG, although without differences (p=0.462).                               |
|                          |                                                                                                                   |                                                                                                                                    | →CG: Usual care.                                                                                                                                                                                                                                                     |                          |                                                                                                                       | -Pulmonary function: PEF <sup>A, C</sup>                                  |                                                                                                           |
|                          |                                                                                                                   |                                                                                                                                    |                                                                                                                                                                                                                                                                      |                          |                                                                                                                       | -QoL <sup>B, D</sup> : EORTC-QLQ-C30                                      |                                                                                                           |
|                          |                                                                                                                   |                                                                                                                                    |                                                                                                                                                                                                                                                                      |                          |                                                                                                                       | -Dyspnea <sup>B, D</sup> : EORTC LC-13                                    | -Incidence of pulmonary POCs was reduced by 18.2% when compared to the CG (p=0.019).                      |
|                          |                                                                                                                   |                                                                                                                                    |                                                                                                                                                                                                                                                                      |                          |                                                                                                                       | -Pulmonary POCs <sup>C</sup>                                              |                                                                                                           |
|                          |                                                                                                                   |                                                                                                                                    |                                                                                                                                                                                                                                                                      |                          |                                                                                                                       | -PHT <sup>C</sup>                                                         | -Shorter overall PHT in the IG (15.6 ± 3.6 vs 17.7 ± 5.3 days, p=0.023).                                  |
|                          |                                                                                                                   |                                                                                                                                    |                                                                                                                                                                                                                                                                      |                          |                                                                                                                       | -Health-related expenses <sup>C</sup>                                     |                                                                                                           |

|                            |                                                                    |                                                                                                                                               |                                                                                                                                                                                                                                                                                                           |                                                                                                                                           |                                                                                                                                                                                                                                                                                                                                       |
|----------------------------|--------------------------------------------------------------------|-----------------------------------------------------------------------------------------------------------------------------------------------|-----------------------------------------------------------------------------------------------------------------------------------------------------------------------------------------------------------------------------------------------------------------------------------------------------------|-------------------------------------------------------------------------------------------------------------------------------------------|---------------------------------------------------------------------------------------------------------------------------------------------------------------------------------------------------------------------------------------------------------------------------------------------------------------------------------------|
|                            |                                                                    | Multimodal prehabilitation.                                                                                                                   |                                                                                                                                                                                                                                                                                                           |                                                                                                                                           | -The IG significantly improved functional capacity in the pre-operative (+36.9 m vs -22.5 m) and post-operative (+15.4 m vs -81.8 m) periods, as well as from baseline to discharge. In addition, in the IG, 52% attained functional improvements after the surgery.                                                                  |
|                            |                                                                    | Non-supervised sessions.                                                                                                                      |                                                                                                                                                                                                                                                                                                           |                                                                                                                                           |                                                                                                                                                                                                                                                                                                                                       |
|                            |                                                                    | →IG*: (1) (a) Moderate AT (the patients were instructed to choose the intensity according to the Borg scale between 6 and 20);                |                                                                                                                                                                                                                                                                                                           | Weekly phone follow-up and according to a training registration diary. 11 did not complete the post-operative assessment. 63% compliance. | -Duration: 02/2013-06/2017.<br><br>-Measurement: T1: Enrollment/Randomization, T2: Before the surgery, T3: 4-8 weeks after the surgery.<br><br>-Functional capacity: 6MWT <sup>A,C</sup><br><br>-POCs ( <i>Clavien Dindo, Comprehensive Complication Index</i> ) <sup>D</sup><br><br>-Mortality <sup>D</sup><br><br>-PHT <sup>D</sup> |
|                            | In the patients' homes.                                            | -5-minute warming-up                                                                                                                          |                                                                                                                                                                                                                                                                                                           |                                                                                                                                           |                                                                                                                                                                                                                                                                                                                                       |
|                            | Open esophagectomy, N,                                             | Non-supervise d exercises. An initial training session with a Kinesiologist linked to the Health Center of McGill University (Quebec, Canada) | -30 seconds at 12-13 of SE (Borg scale)<br>-5-minute cooling-down<br>(b) 3 series x 8-12 repetitions of MS for 8 muscle groups with an intensity of 5-6 out of 10 in the ACSM/AHA scale.<br>(2). Nutritional counseling + Protein supplementation<br>(Immunocal; Immunotec Inc) for 1.2-1.5 g protein/Kg. | 2-10 weeks, 3 days/week for AT and MS                                                                                                     |                                                                                                                                                                                                                                                                                                                                       |
| Minnella et al. [33], 2018 | MA=51; 67.6; IG, MA: n=26, 67.3 ± (7.4); CG, MA: n=25, 68 ± (11.6) |                                                                                                                                               |                                                                                                                                                                                                                                                                                                           |                                                                                                                                           |                                                                                                                                                                                                                                                                                                                                       |
|                            |                                                                    | →CG: Usual care ( <i>Enhanced recovery pathways for esophagectomy</i> )                                                                       |                                                                                                                                                                                                                                                                                                           |                                                                                                                                           | Better physical and nutritional conditions can significantly assist in undergoing systemic therapy or full cancer treatment.                                                                                                                                                                                                          |

|                          |                                                                                                |                                                                |                                                                                                                        |                                             |                                        |                                                                        |                                                                                                                                    |
|--------------------------|------------------------------------------------------------------------------------------------|----------------------------------------------------------------|------------------------------------------------------------------------------------------------------------------------|---------------------------------------------|----------------------------------------|------------------------------------------------------------------------|------------------------------------------------------------------------------------------------------------------------------------|
| Morano et al. [29], 2014 | Pulmonary resection due to NSCLC, N, MA=24, 67; IG, MA: n=12, 65 ± (8); CG, MA: n=12, 69 ± (7) | Rehabilitation room of the Fortaleza hospitals (Brazil). PhTs. | Prehabilitation based on multicomponent training. No information about supervision.                                    | 4 weeks, 5 days/week for all the exercises. | Follow-up and compliance rate unknown. | -Duration: 03/2008-03/2011.                                            | -Distance in 6MWT decreases after the intervention (from 425 ± 85 m to 339 ± 108 m), and is not significant in relation to the CG; |
|                          |                                                                                                |                                                                |                                                                                                                        |                                             |                                        |                                                                        |                                                                                                                                    |
|                          |                                                                                                |                                                                | →IG (pulmonary rehab group). (a) AT on treadmill at 80% Peakw Adjustment and length of sessions unknown.               |                                             |                                        | -Measurement: T1: Surgery decision, T2: Prehab end (4 weeks after T1). | In addition, Strength in UULL increased from 1.13 to 1.58 kg per month, and with a mean of 0.7 in relation to the CG (p<0.02)      |
|                          |                                                                                                |                                                                | Follow-up and if there were training sessions unknown.                                                                 |                                             |                                        | -Functional capacity: 6MWT <sup>B, D</sup> , UULEX <sup>A, C</sup>     | -The anxiety and depression scores are significantly reduced (p<0.02), the final QoL score is comparable to the CG (p= 0.59).      |
|                          |                                                                                                |                                                                | (b) with a bar at 50% of peak work capacity.                                                                           |                                             |                                        | -QoL: SF-36 <sup>B, D</sup> , HADS <sup>A, C</sup>                     |                                                                                                                                    |
|                          |                                                                                                |                                                                | (c): IMT: Breathing patterns, breadths with pursed lips and incentive spirometer ( <i>Respirom</i> ®, <i>Brazil</i> ). |                                             |                                        | -[Fibrinogen in mg/dl] <sup>A, C</sup>                                 |                                                                                                                                    |
|                          |                                                                                                |                                                                | →CG (thoracic physiotherapy group) underwent IMT training.                                                             |                                             |                                        | -[Albumin in g/dl] <sup>B, D</sup>                                     | -Peri-operative PR is effective in reducing the fibrinogen blood levels, but not those of albumin.                                 |

|                        |                                                                                           |                                                                  |                                                                                                                                                                                                                                                                                                                                                                                                                                                                                                                                                                                                                                         |                                           |                                                                                                                         |                                                                                                                                                                                                                                                                                                                                                                                                                                                                                               |                                                                                                                                                                                                                                                                                                                                                                                                                                                                                       |                                                       |
|------------------------|-------------------------------------------------------------------------------------------|------------------------------------------------------------------|-----------------------------------------------------------------------------------------------------------------------------------------------------------------------------------------------------------------------------------------------------------------------------------------------------------------------------------------------------------------------------------------------------------------------------------------------------------------------------------------------------------------------------------------------------------------------------------------------------------------------------------------|-------------------------------------------|-------------------------------------------------------------------------------------------------------------------------|-----------------------------------------------------------------------------------------------------------------------------------------------------------------------------------------------------------------------------------------------------------------------------------------------------------------------------------------------------------------------------------------------------------------------------------------------------------------------------------------------|---------------------------------------------------------------------------------------------------------------------------------------------------------------------------------------------------------------------------------------------------------------------------------------------------------------------------------------------------------------------------------------------------------------------------------------------------------------------------------------|-------------------------------------------------------|
| Sebio et al.[31], 2017 | VATS due to NSCLC, N, MA=22, 70.1; IG, MA: n=10, 70.9 ± (6.1); CG, MA: n=12, 69.4 ± (9.4) | Hospital rehabilitation room, Corunna (Spain). Respiratory PhTs. | Prehabilitation based on multicomponent training. Supervised sessions.                                                                                                                                                                                                                                                                                                                                                                                                                                                                                                                                                                  |                                           |                                                                                                                         |                                                                                                                                                                                                                                                                                                                                                                                                                                                                                               | -Duration: 2013-2015.                                                                                                                                                                                                                                                                                                                                                                                                                                                                 | -Between T1 and T2, the IG improved physical activity |
|                        |                                                                                           |                                                                  | →IG*: (a) 30 minutes of moderate AA ( <i>Monark 818 E</i> cycloergometer) determined by Peak <sub>w</sub><br>-5-minute warming-up (30% Peak <sub>w</sub> )<br>-1 minute (80% Peak <sub>w</sub> )<br>-4-minute active rest (30% Peak <sub>w</sub> )<br>-4-minute cooling-down (30% Peak <sub>w</sub> )<br>(b) MS ( <i>Theraband</i> ), 3 series (4 series if the patient tolerates it) x 15 repetitions for 6 muscle groups according to SE; 45-second rest between series.<br>(c) IMT ( <i>Coach 2 Incentive Spirometer</i> ®) 6 series x 5 breadths at 80% of FVC; 1-minute rest between series.<br><br>→CG: It received IMT training. | 7-8 weeks, 3-5 days for all the exercises | 50% compliance (pre-IG: n=20, 2 abandoned PR (10%), 8 for other reasons; Final IG: n=10). Median of 16 (8-25) sessions. | -Measurement: T1: Enrollment/R andomization, T2: Prehab end (median of 54.5 days), T3: 3 months after the surgery.<br><br>-Functional capacity: 6MWT <sup>B, D</sup> , UULL strength ( <i>Arm Curl Test</i> ) <sup>A, C</sup> LLLL strength (30's <i>Chair-to-Stand Test</i> ) <sup>A, C</sup><br><br>-Physical activity level <sup>A, C</sup> : Sustained length during CPET<br><br>-QoL: SF-36 v2 <sup>A</sup><br><br>POCs ( <i>Melbourne group</i> ) <sup>D</sup><br><br>-PHT <sup>D</sup> | level (+397 s, p<0.001), overall health, PhC (+4.4 points, p=0.08) and muscle strength<br>Improvement in 6MWT was not significant (+7.5 m, 95% CI -2.1 m-17.1 m).<br><br>-T3: there were no differences between the groups, although level of activity (+226 s vs -137 s, p<0.005), muscle strength (p=0.045 and p=0.002) and PhC (+4.3 vs -4.8 points, p=0.001) did present significant improvements; 6MWT in the IG remains practically the same when compared to the CG (p=0.186). |                                                       |

|  |                                                                           |                                                                                                                                         |                                                                                                                                                                   |                               |  |                                                                                     |                                                                                                                      |  |                                                                                                                                                                                                                                                                   |
|--|---------------------------------------------------------------------------|-----------------------------------------------------------------------------------------------------------------------------------------|-------------------------------------------------------------------------------------------------------------------------------------------------------------------|-------------------------------|--|-------------------------------------------------------------------------------------|----------------------------------------------------------------------------------------------------------------------|--|-------------------------------------------------------------------------------------------------------------------------------------------------------------------------------------------------------------------------------------------------------------------|
|  |                                                                           |                                                                                                                                         |                                                                                                                                                                   |                               |  |                                                                                     |                                                                                                                      |  | -Substudy of the PREPARE multicentric RCT. The frailty, physical activity level and SPPB scores did not show differences in relation to the CG.                                                                                                                   |
|  |                                                                           |                                                                                                                                         | Multimodal prehabilitation. Supervised sessions.                                                                                                                  |                               |  |                                                                                     |                                                                                                                      |  | 8 participants from the CG and 10 from the IG maintained moderate functional limitations at T1-T2 (SPPB < 9).                                                                                                                                                     |
|  |                                                                           |                                                                                                                                         | →IG*. (1). MVPA sessions, previously adjusted and agreed upon by a specialized cardiologist:                                                                      |                               |  | Total program compliance (8 or more AT sessions and the 4 sessions) of 28.6% (n=4). |                                                                                                                      |  | -Although 6MWT improved 10.3% when compared to the CG, it was not statistically significant (difference between the means: +34.2 m vs 4.6 m, p>0.05). If we perform an analysis by subgroups between the IG that completed the program and the partial prehab IG, |
|  | CABG, CABG + AVR N, MA=26, n=14, 72.8 ± (7.1); CG, MA: n=12, 70.3 ± (5.4) | Community CR centers attached to the St. Boniface and St. James Hospitals, and Queen Elizabeth II HSC (Canada). PhTs and medical staff. | -15-minute warming-up.<br>-10-30' MVPA 40-60% HR ( <i>Karvonen Formula</i> ): 85% Peak VO <sub>2</sub> , if the patient tolerates it.<br>-10-minute cooling-down. | 7.7 (5.5) weeks, twice a week |  | with at least 25% of the sessions. The mean of sessions attended/patient was        | (55-60 days before T2); T2: 1 week before the surgery; T3: 3 months after the surgery; T4: 1 year after the surgery. |  |                                                                                                                                                                                                                                                                   |
|  |                                                                           |                                                                                                                                         | (2). 4 psychosocial sessions (lifestyles, stress management and motivation).                                                                                      |                               |  |                                                                                     | -Frailty: FFP, FFI A                                                                                                 |  |                                                                                                                                                                                                                                                                   |
|  |                                                                           |                                                                                                                                         | →CG: Usual care. Low-intensity physical exercises were recommended.                                                                                               |                               |  |                                                                                     | -Functional capacity B, D: 6MWT, SPPB                                                                                |  |                                                                                                                                                                                                                                                                   |
|  |                                                                           |                                                                                                                                         |                                                                                                                                                                   |                               |  |                                                                                     | -Physical activity level: Sustained MVPA, in minutes B, D.                                                           |  |                                                                                                                                                                                                                                                                   |
|  |                                                                           |                                                                                                                                         |                                                                                                                                                                   |                               |  |                                                                                     | -PHT D                                                                                                               |  |                                                                                                                                                                                                                                                                   |
|  |                                                                           |                                                                                                                                         |                                                                                                                                                                   |                               |  |                                                                                     |                                                                                                                      |  | -Adherence to the program supposes greater benefits.                                                                                                                                                                                                              |
|  |                                                                           |                                                                                                                                         |                                                                                                                                                                   |                               |  |                                                                                     |                                                                                                                      |  | -PHT and length of ICU stay were                                                                                                                                                                                                                                  |



|                             |                                                                                     |                                                                       |                                                                                                                                                                                                                                                                                                                                                      |                                                                                                            |                                                                                                                                                                              |
|-----------------------------|-------------------------------------------------------------------------------------|-----------------------------------------------------------------------|------------------------------------------------------------------------------------------------------------------------------------------------------------------------------------------------------------------------------------------------------------------------------------------------------------------------------------------------------|------------------------------------------------------------------------------------------------------------|------------------------------------------------------------------------------------------------------------------------------------------------------------------------------|
|                             |                                                                                     |                                                                       |                                                                                                                                                                                                                                                                                                                                                      |                                                                                                            | comparable between the 2 groups. PHT (7[6.5-8.5] vs 8 [5-19.5] days, $p>0.05$ ).                                                                                             |
| Steinmetz et al. [34], 2019 | CABG, N, MA=203, 67.1 ± 8.4; IG, MA: n=88, 66.1 ± (9); CG, MA: n=115, 67.9 ± (7.9). | Clinic's rehabilitation room (Kerckhoff Heart Center, Germany). PhTs. | Prehabilitation based on multicomponent training. Supervised sessions.                                                                                                                                                                                                                                                                               | -Duration: 12/2014-03/2018                                                                                 | - Cardiorespiratory capacity improves in the pre- and post-operative periods only in the IG, although without differences in relation to the CG.                             |
|                             |                                                                                     |                                                                       | →IG*:<br>(a) AA x 2 series/day at 70% Peak VO <sub>2</sub> with incremental time/session (1 <sup>st</sup> session 2 x 10'; 2 <sup>nd</sup> and 3 <sup>rd</sup> sessions 2 x 15'; 4 <sup>th</sup> and 5 <sup>th</sup> sessions 2 x 20'; 6 <sup>th</sup> session 2 x 25') with each session interspersed by 15' of breathing + coordination exercises. | 92% compliance (n of the CG at T1=88, n at T4=81; did not receive the intervention: 7, did not answer: 1). | T1: 2.5-3 weeks before CABG; T2: One day before; T3: CR (7-10 days after); T4: End of CR (3 weeks after).<br>-Aerobic capacity <sup>B, D</sup> : Peakw, Peak VO <sub>2</sub> |
|                             |                                                                                     |                                                                       | →CG: Usual care.                                                                                                                                                                                                                                                                                                                                     |                                                                                                            | -Functional capacity <sup>A, C</sup> : 6MWT, TUG (in seconds)                                                                                                                |

|                                                                                                                                                        |                                                                                                                                                                                               |                                                                                                                      |                                                                                                                                                                                                                                                                                                                                                                                                                                                                                                                           |                                                                          |                                                                                                                                                                              |
|--------------------------------------------------------------------------------------------------------------------------------------------------------|-----------------------------------------------------------------------------------------------------------------------------------------------------------------------------------------------|----------------------------------------------------------------------------------------------------------------------|---------------------------------------------------------------------------------------------------------------------------------------------------------------------------------------------------------------------------------------------------------------------------------------------------------------------------------------------------------------------------------------------------------------------------------------------------------------------------------------------------------------------------|--------------------------------------------------------------------------|------------------------------------------------------------------------------------------------------------------------------------------------------------------------------|
| Vagvolgyi et al. [30], 2018                                                                                                                            | Pulmonary resection due to NSCLC, N, MA=238, 63.6; PRE group (IG), MA: n=72, 65 ± (7); Pre-operative intervention group (RPP) (IG), MA: n=86, 65 ± (6); POST group (CG), MA: n=80, 61 ± (10). | PR room (Koranyi National Neumology Institute, Hungary). PhTs.                                                       | Prehabilitation based on AT and IMT. Supervised sessions. IG*. (1) (a) PRE group (AA-IMT) and RPP group (pre-AA-IMT + post-IMT). 2-3 series/day of customized AT in treadmill, with incremental intensity: 60% → 80% Peakw according to SE (the objective was to maintain a value of 7 in Borg scale). (b) 30 daily minutes of IMT: Controlled breathing, expectoration and thoracic mobilization. (2) 45-minute smoking cessation sessions and motivational and psychological support. Exact number of sessions unknown. | 3 weeks. Adherence rates not reported, and follow-up unknown. Daily IMT. | -QoL: <i>McNew</i> questionnaire <sup>B, D</sup> mean at T4: -1.1 s, p=0.018). The improvements in relation to QoL were more accentuated in the IG than in the CG (p=0.137). |
|                                                                                                                                                        |                                                                                                                                                                                               |                                                                                                                      |                                                                                                                                                                                                                                                                                                                                                                                                                                                                                                                           |                                                                          |                                                                                                                                                                              |
| The 3 groups improved functional (6MWT) and aerobic (cycloergometry) capacity levels, pulmonary function and QoL after their respective interventions. | -Duration: 11/2016-01/2018.                                                                                                                                                                   | -Measurement: T1: Prehab start (3 weeks before); T2: Prehab end, surgery; T3: Post-operative PR end (3 weeks after). | -RPP denoted the greatest improvements as it benefited from double PR, before and after. Many of these were significant in relation to the initial value, for example: 6MWT (T1-T3; from 378.3 m ± 90.5 to 403.3 m ± 98.4 m, p<0.0001) and time sustained low in CPET and distance covered (from 7.2 ± 3.2                                                                                                                                                                                                                | -Functional capacity: 6MWT <sup>A</sup> .                                | -Physical activity level: Kilometers covered and sustained AA <sup>A</sup> .                                                                                                 |
|                                                                                                                                                        |                                                                                                                                                                                               |                                                                                                                      |                                                                                                                                                                                                                                                                                                                                                                                                                                                                                                                           |                                                                          |                                                                                                                                                                              |
| -Pulmonary function <sup>A</sup> : FEV, FVC, MIP                                                                                                       | -QoL: mMRC <sup>A</sup>                                                                                                                                                                       |                                                                                                                      |                                                                                                                                                                                                                                                                                                                                                                                                                                                                                                                           |                                                                          |                                                                                                                                                                              |
|                                                                                                                                                        |                                                                                                                                                                                               |                                                                                                                      |                                                                                                                                                                                                                                                                                                                                                                                                                                                                                                                           |                                                                          |                                                                                                                                                                              |

14.5 ± 4.5 minutes;  
from 3.6 ± 1.9 to  
7.5 ± 2.9 km,  
p<0.0001).

-After a discriminant  
analysis of several  
measures, the  
authors show an  
effective algorithm to  
predict the risk of  
POCs, based on a  
combination and  
stratification of age,  
FEV<sub>1</sub>, initial 6MWT  
value and distance  
covered in the  
treadmill.

Non-Small Cell Lung Cancer (NSCLC); High-Intensity Interval Training (HIIT); PeakW (Peak aerobic power); Aerobic Training (AT); Peak oxygen uptake (Peak VO<sub>2</sub>); 6-Minute Walk Test (6MWT); Cardiopulmonary Effort Test (CPET); Inspiratory Muscle Training (IMT); Peak Inspiratory Pressure (PIP); Forced Expiratory Volume in 1 second (FEV<sub>1</sub>); Forced Vital Capacity (FVC); Inspiratory Muscle Resistance (IMR); Subjective Exhaustion (SE); Peak Expiratory Flow (PEF); Post-operative Complications (POCs); Prolonged Hospitalization Time (PHT); Quality of Life (QoL); Muscle Strengthening (MS); Physical Component (PhC); Mental Component (MC); Lower Limbs (LLLL) and Upper Limbs (UULL); Un-supported Upper Limbs Effort Test (UULEX); Hospital Anxiety and Depression Scale (HADS); Short-form-36 health questionnaire (SF-36); Video-Assisted Thoracic Surgery (VATS); Coronary Artery Bypass Grafting (CABG); Aortic Valve Repair/Replacement (AVR) or Mitral Valve Repair/Replacement (MVR); Moderate-Vigorous Physical Activity (MVPA); Functional Frailty Index (FFI); Cardiac Rehabilitation (CR); Time-up and Go test (TUG); Chronic Obstructive Pulmonary Diseases (COPD); modified Medical Research Council scale (mMRC). A: Significant improvements in the IG between baseline and last measurement; B: No significant improvements in the IG between first and last measurements; C: Statistically significant improvement in the IG in relation to the CG; D: No significant differences between the IG and the CG; \*: Content and intensity of the physical exercises were selected and adjusted according to theoretically argued recommendations.

**Table S3.** Appraisal of the methodological quality of the studies selected.

| Author/s and Year            | Scores of the Jadad Items |   |   |   |   |   |   |       | Risk of Bias/Limitations                                                                                                                                                                    |
|------------------------------|---------------------------|---|---|---|---|---|---|-------|---------------------------------------------------------------------------------------------------------------------------------------------------------------------------------------------|
|                              | 1                         | 2 | 3 | 4 | 5 | 6 | 7 | Total |                                                                                                                                                                                             |
| Bathia and Kaiser [27], 2019 | 1                         | 1 | 0 | 0 | 1 | 0 | 0 | 3     | -Risk of conduction bias, as there is no blinding of the participants.                                                                                                                      |
| Guinan et al. [32], 2019     | 1                         | 1 | 0 | 0 | 1 | 0 | 0 | 3     | -Risk of conduction bias, as there is no blinding of the participants.<br>-Significant differences in the level of moderate physical activity between the IG and the CG before the surgery. |
| Lai et al. [28], 2017        | 1                         | 1 | 0 | 0 | 1 | 0 | 0 | 3     | -Risk of conduction bias, as there is no blinding of the participants.                                                                                                                      |
| Minnella et al. [33], 2018   | 1                         | 1 | 0 | 0 | 1 | 0 | 0 | 3     | -Reduced sample size.                                                                                                                                                                       |
| Morano et al. [29], 2014     | 1                         | 1 | 0 | 0 | 1 | 0 | 0 | 3     | -Risk of conduction bias, as there is no blinding of the participants.                                                                                                                      |
| Sebio et al. [31], 2017      | 1                         | 1 | 0 | 0 | 1 | 0 | 0 | 3     | -Reduced sample size.                                                                                                                                                                       |
| Stammers [35], 2016          | 1                         | 1 | 0 | 0 | 1 | 0 | 0 | 3     | -Risk of conduction bias, as there is no blinding of the participants.                                                                                                                      |
| Steinmetz et al. [34], 2019  | 1                         | 1 | 0 | 0 | 1 | 0 | 0 | 3     | -Risk of conduction bias, as there is no blinding of the participants.                                                                                                                      |
| Vagvolgyi et al. [30], 2018  | 1                         | 1 | 0 | 0 | 1 | 0 | 0 | 3     | -Risk of conduction bias, as there is no blinding of the participants.                                                                                                                      |

**Table S4.** Appraisal of the therapeutic validity of the studies selected.

| Author/s<br>and Year               | Selection of the Patients |          | Selection of the Therapist<br>and of the Environment |           | Reason                                                                     |                                                        | Content   |                                        | Adherence  | Overall<br>Score |
|------------------------------------|---------------------------|----------|------------------------------------------------------|-----------|----------------------------------------------------------------------------|--------------------------------------------------------|-----------|----------------------------------------|------------|------------------|
|                                    | Description               | Adequate |                                                      |           | Exercise<br>based on<br>objectives<br>and<br>hypothesis<br><i>a priori</i> | Content and<br>intensity are<br>described<br>and valid | Intensity | Controlled<br>and adjusted<br>exercise | Customized |                  |
| Bathia and<br>Kaiser<br>[27], 2019 | Yes                       | Yes      | Yes                                                  | Yes       | Yes                                                                        | Yes                                                    | Yes       | Yes                                    | Yes        | 9 (100%)         |
| Guinan et al.<br>[32], 2019        | No                        | Yes      | No                                                   | Yes       | No                                                                         | Yes                                                    | Yes       | No                                     | No         | 4 (44.4%)        |
| Lai et al.<br>[28], 2017           | Yes                       | Yes      | Yes                                                  | Yes       | Yes                                                                        | Yes                                                    | Yes       | Yes                                    | Yes        | 9 (100%)         |
| Minnella et<br>al. [33], 2018      | Yes                       | Yes      | Yes                                                  | Yes       | Yes                                                                        | Yes                                                    | Yes       | Yes                                    | Yes        | 9 (100%)         |
| Morano et al.<br>[29], 2014        | Yes                       | Yes      | No                                                   | No        | No                                                                         | Yes                                                    | No        | No                                     | No         | 3 (33.3%)        |
| Sebio et al.<br>[31], 2017         | Yes                       | Yes      | Yes                                                  | Yes       | No                                                                         | Yes                                                    | Yes       | No                                     | Yes        | 7 (77.7%)        |
| Stammers<br>[35], 2016             | Yes                       | Yes      | Yes                                                  | Yes       | Yes                                                                        | Yes                                                    | Yes       | Yes                                    | No         | 8 (88.8%)        |
| Steinmetz et<br>al. [34], 2019     | Yes                       | Yes      | Yes                                                  | Yes       | No                                                                         | Yes                                                    | Yes       | Yes                                    | No         | 7 (77.7%)        |
| Vagvolgyi et<br>al. [30], 2018     | Yes                       | Yes      | No                                                   | Yes       | No                                                                         | No                                                     | No        | No                                     | No         | 3 (33.3%)        |
| <b>Overall<br/>score</b>           | 8 (88.8%)                 | 9 (100%) | 6 (66.6%)                                            | 8 (88.8%) | 3 (33.3%)                                                                  | 8 (88.8%)                                              | 7 (77.7%) | 5 (55.5%)                              | 4 (44.4%)  |                  |
